# Supplementary material
Source: Royal Society of Chemistry journal article supplement (doi:10.1039/d6ay00322b)
Supplement: d6ay00322b1.pdf [file d6ay00322b1.pdf]

## Supplementary Information

### RSM-optimized automated DI-SPME-GC-MS/MS for multi-class trace plasticizers in drinking water

Ying Zhao,<sup>§a</sup> Hongfang Gao,<sup>§b</sup> Yixin Liu,<sup>c</sup> Wei Wang,<sup>a</sup> Caixia Wang<sup>\*a</sup>

<sup>a</sup> Institute of Physical and Chemical Testing, Shaanxi Provincial Center for Disease Control and Prevention, Xi'an, 710054, P.R. China.

<sup>b</sup> School of Environmental Science and Engineering, Wuxi University, Wuxi, 214105, P.R. China

<sup>c</sup> Department of Computer Science and Engineering, The Hong Kong University of Science and Technology, Hong Kong SAR, 999077, P.R. China

E-mail: [caixiawang2845@163.com](mailto:caixiawang2845@163.com)

<sup>§</sup> Ying Zhao and Hongfang Gao contributed equally to this work.

## **S1 Chemicals and supplies**

HPLC grade ethyl acetate and acetone were purchased from Fisher Scientific (Loughborough, UK). Sodium chloride was purchased from Sinopharm (AR, Shanghai, China). A mixed standard solution of 29 plasticizers in ethyl acetate (1000 µg/mL) was custom-made from TanMo Reference Materials Co., Ltd. (Changzhou, China). The internal standard butyl benzoate (100 mg, purity  $\geq$  95%) was obtained from Dr. Ehrenstorfer GmbH (Augsburg, Germany) and benzyl benzoate (100 mg, purity  $\geq$  98%) was obtained from Alta Scientific (Tianjin, China). Butyl benzoate and benzyl benzoate were selected as internal standards due to their similar physicochemical properties to the target analytes, stable responses, absence in the analyzed real samples, low cost, and ready availability. Ultrapure water (18.4 M $\Omega$ ·cm) was produced in-house using a Milli-Q water purification system acquired from Millipore (Bedford, USA). Drinking water samples were collected locally, stored at 4 °C, and analyzed within 24 h of collection.

The analyte stock solution (100 µg/mL) and the internal standard stock solution (100 µg/mL) were prepared, diluted with ethyl acetate and stored in amber glass bottles at 4 °C. Intermediate solutions were then prepared by diluting the stock solutions with ethyl acetate. Working solutions of all the analytes were prepared by diluting the intermediate solutions with ultrapure water, with the analytes at concentrations ranging from 0.005 to 20 µg/L and both internal standards at 2 µg/L. Additionally, blank solutions spiked with the analytes and internal standards at 2 µg/L each were prepared for experimental condition optimization.

## **S2 Instrumentation and conditions**

The SPME process was performed on an automated sample pretreatment platform based on the PAL (Prep and Load) robotic system (CTC Analytics AG, Zwingen, Switzerland). The platform was constructed on a custom-built RTC850 PAL system (Guangzhou Intelligent Laboratory Technology Co., Ltd., Guangzhou, China), configured with a smart chip identification SPME Arrow replacement module, a SPME Arrow conditioning module, an agitator incubation module, a Heatex stirrer extraction module, a solvent storage module, a temperature-controlled module, and sample tray holders. The debugging and operation of the platform were carried out through the central control panel. The control software written in C++ language was used to set method parameters, establish sequences and trigger the connection with GC-MS/MS via the communication line.

The 1.1 mm outer diameter Smart SPME Arrow kit (Inlab-4AS0-001) and 20 mL sample glass vials

equipped with fitted magnetic screw-on caps with PTFE-faced silicone septa (Inlab-2001) were both provided by the platform supplier as well. The coating types and phase thicknesses of the extraction heads were 100  $\mu\text{m}$  polydimethylsiloxane (PDMS), 100  $\mu\text{m}$  polyacrylate (PA), 120  $\mu\text{m}$  carbon wide range (Carbon WR)/PDMS, 120  $\mu\text{m}$  divinylbenzene (DVB)/PDMS, and 120  $\mu\text{m}$  DVB/Carbon WR/PDMS. The SPME Arrows required a 30-min conditioning before first use and an additional 5-min conditioning after each sample injection, both of which were carried out in the conditioning module. The optimized automated DI-SPME conditions were as follows: stirring rate of 500 rpm, extraction temperature of 66  $^{\circ}\text{C}$ , extraction time of 34 min, desorption time of 336 s, desorption temperature of 270  $^{\circ}\text{C}$ , no addition of NaCl, and immersion depth of the SPME Arrow of 50 mm.

The sample analysis was performed by the 7890B-7000C GC-MS/MS (Agilent Technologies, Santa Clara, CA, USA) equipped with the HP-5MS UI fused-silica capillary column (30 m length  $\times$  0.25 mm i.d., 0.25  $\mu\text{m}$  film thickness). The large-volume injection port was adjusted to a temperature of 270  $^{\circ}\text{C}$  in splitless injection mode. High purity helium (99.99%) was employed as the carrier gas at a constant flow rate of 1 mL/min. The oven temperature program was initially held at 80  $^{\circ}\text{C}$ , ramped at 15  $^{\circ}\text{C}/\text{min}$  to 180  $^{\circ}\text{C}$  and held for 1 min, then ramped at 5  $^{\circ}\text{C}/\text{min}$  to 220  $^{\circ}\text{C}$  and held for 2 min, and finally ramped at 10  $^{\circ}\text{C}/\text{min}$  to 260  $^{\circ}\text{C}$  and held for 10 min.

The electron ionization (EI) source was selected with the ion source energy of 70 eV. The ion source temperature was kept at 250  $^{\circ}\text{C}$ , and the transfer line temperature was maintained at 270  $^{\circ}\text{C}$ . High purity nitrogen (99.99%) was employed as the collision gas at a pressure between 1 and 1.2 mTorr.

**Table S1 Factor levels and coded values of the Plackett-Burman design**

| Factors                                     | code | levels |     |
|---------------------------------------------|------|--------|-----|
|                                             |      | -1     | 1   |
| Stirring rate / rpm                         | A    | 500    | 800 |
| Extraction temperature / $^{\circ}\text{C}$ | B    | 40     | 70  |
| Extraction time / min                       | C    | 30     | 60  |
| Desorption time / s                         | D    | 180    | 360 |
| Desorption temperature / $^{\circ}\text{C}$ | E    | 250    | 280 |
| NaCl addition / g                           | F    | 0      | 2   |

**Table S2 Design and results of the Plackett-Burman experiment**

| std | run | A  | B  | C  | D  | E  | F  | Y       |
|-----|-----|----|----|----|----|----|----|---------|
| 1   | 1   | 1  | 1  | -1 | 1  | 1  | 1  | 53.3873 |
| 2   | 2   | -1 | 1  | 1  | -1 | 1  | 1  | 48.9983 |
| 10  | 3   | -1 | 1  | 1  | 1  | -1 | -1 | 51.1698 |
| 3   | 4   | 1  | -1 | 1  | 1  | -1 | 1  | 47.1808 |
| 7   | 5   | 1  | -1 | -1 | -1 | 1  | -1 | 43.7729 |
| 12  | 6   | -1 | -1 | -1 | -1 | -1 | -1 | 44.7631 |
| 9   | 7   | 1  | 1  | 1  | -1 | -1 | -1 | 48.6454 |
| 5   | 8   | -1 | -1 | 1  | -1 | 1  | 1  | 43.3525 |
| 8   | 9   | 1  | 1  | -1 | -1 | -1 | 1  | 48.9940 |
| 6   | 10  | -1 | -1 | -1 | 1  | -1 | 1  | 49.0517 |
| 4   | 11  | -1 | 1  | -1 | 1  | 1  | -1 | 55.3948 |
| 11  | 12  | 1  | -1 | 1  | 1  | 1  | -1 | 46.3191 |

**Table S3 ANOVA results of the Plackett-Burman experiment**

| Source                   | Sum of squares | Degree of Freedom | Mean square | F-value | P-value | significance |
|--------------------------|----------------|-------------------|-------------|---------|---------|--------------|
| Model                    | 143.75         | 6                 | 23.96       | 24.73   | 0.0014  | significant  |
| A-Stirring rate          | 1.64           | 1                 | 1.64        | 1.69    | 0.2505  |              |
| B-Extraction temperature | 86.13          | 1                 | 86.13       | 88.91   | 0.0002  | significant  |
| C-Extraction time        | 7.84           | 1                 | 7.84        | 8.09    | 0.0361  | significant  |
| D-Desorption time        | 47.91          | 1                 | 47.91       | 49.45   | 0.0009  | significant  |
| E-Desorption temperature | 0.1681         | 1                 | 0.1681      | 0.1735  | 0.6943  |              |
| F-NaCl addition          | 0.0674         | 1                 | 0.0674      | 0.0696  | 0.8025  |              |
| Residual                 | 4.84           | 5                 | 0.9688      |         |         |              |
| Cor Total                | 148.59         | 11                |             |         |         |              |

Std. Dev. = 0.9843

Mean = 48.42

C.V. % = 2.03

 $R^2 = 0.9674$ Adjusted  $R^2 = 0.9283$ Predicted  $R^2 = 0.8122$ 

Adeq Precision = 14.3944

**Table S4 Design and results of the steepest ascent experiment**

| Run | length       | Extraction temperature / °C | Extraction time / min | Desorption time / s | Y       |
|-----|--------------|-----------------------------|-----------------------|---------------------|---------|
| 1   | 0            | 55                          | 45                    | 270                 | 43.4282 |
| 2   | 0+1 $\Delta$ | 60                          | 40                    | 300                 | 48.5480 |
| 3   | 0+2 $\Delta$ | 65                          | 35                    | 330                 | 52.5719 |
| 4   | 0+3 $\Delta$ | 70                          | 30                    | 360                 | 46.8864 |
| 5   | 0+4 $\Delta$ | 75                          | 25                    | 390                 | 33.0928 |

**Table S5 Factors and levels of the Box-Behnken design**

| Factors                     | code | levels |     |     |
|-----------------------------|------|--------|-----|-----|
|                             |      | -1     | 0   | 1   |
| Extraction temperature / °C | A    | 60     | 65  | 70  |
| Extraction time / min       | B    | 30     | 35  | 40  |
| Desorption time / s         | C    | 300    | 330 | 360 |

**Table S6 Design and results of the Box-Behnken experiment**

| std | run | Extraction temperature | Extraction time | Desorption time | Y       |
|-----|-----|------------------------|-----------------|-----------------|---------|
| 4   | 1   | 1                      | 1               | 0               | 50.2690 |
| 5   | 2   | -1                     | 0               | -1              | 45.6884 |
| 15  | 3   | 0                      | 0               | 0               | 53.5200 |
| 10  | 4   | 0                      | 1               | -1              | 46.0283 |
| 17  | 5   | 0                      | 0               | 0               | 53.7184 |
| 16  | 6   | 0                      | 0               | 0               | 53.9354 |
| 13  | 7   | 0                      | 0               | 0               | 52.6949 |
| 8   | 8   | 1                      | 0               | 1               | 50.6258 |
| 11  | 9   | 0                      | -1              | 1               | 50.1750 |
| 2   | 10  | 1                      | -1              | 0               | 48.4206 |
| 7   | 11  | -1                     | 0               | 1               | 47.0315 |
| 1   | 12  | -1                     | -1              | 0               | 48.7287 |
| 14  | 13  | 0                      | 0               | 0               | 54.4678 |
| 6   | 14  | 1                      | 0               | -1              | 47.1657 |
| 9   | 15  | 0                      | -1              | -1              | 47.3768 |
| 12  | 16  | 0                      | 1               | 1               | 46.7480 |
| 3   | 17  | -1                     | 1               | 0               | 44.8641 |

**Table S7 ANOVA results for the regression model of the Box-Behnken design**

| Source                   | Sum of Squares | Degree of Freedom | Mean Square | F-value | P-value  | significance    |
|--------------------------|----------------|-------------------|-------------|---------|----------|-----------------|
| Model                    | 161.44         | 9                 | 17.94       | 44.20   | < 0.0001 | significant     |
| A-Extraction temperature | 12.92          | 1                 | 12.92       | 31.85   | 0.0008   | significant     |
| B-Extraction time        | 5.77           | 1                 | 5.77        | 14.21   | 0.007    | significant     |
| C-Desorption time        | 8.65           | 1                 | 8.65        | 21.33   | 0.0024   | significant     |
| AB                       | 8.16           | 1                 | 8.16        | 20.11   | 0.0029   | significant     |
| AC                       | 1.12           | 1                 | 1.12        | 2.76    | 0.1406   |                 |
| BC                       | 1.08           | 1                 | 1.08        | 2.66    | 0.1468   |                 |
| A <sup>2</sup>           | 32.43          | 1                 | 32.43       | 79.92   | < 0.0001 | significant     |
| B <sup>2</sup>           | 33.51          | 1                 | 33.51       | 82.58   | < 0.0001 | significant     |
| C <sup>2</sup>           | 44.86          | 1                 | 44.86       | 110.53  | < 0.0001 | significant     |
| Residual                 | 2.84           | 7                 | 0.4058      |         |          |                 |
| Lack of Fit              | 1.16           | 3                 | 0.3861      | 0.9178  | 0.5084   | not significant |
| Pure Error               | 1.68           | 4                 | 0.4207      |         |          |                 |
| Cor Total                | 164.29         | 16                |             |         |          |                 |

Std. Dev. = 0.6371

 $R^2 = 0.9827$ 

Mean = 49.5

Adjusted  $R^2 = 0.9605$ 

C.V. % = 1.29

Predicted  $R^2 = 0.8712$ 

Adeq Precision = 18.7167

**Table S8 Concentrations of plasticizer residues in end-use water samples after microextraction by DI-SPME and determination by GC-MS/MS**

| Componen<br>nts | Concentration of plasticizers in samples (µg/L) |             |               |               |                |               |                |                |                |               |                 |               |                |               |                 |                |                |                |
|-----------------|-------------------------------------------------|-------------|---------------|---------------|----------------|---------------|----------------|----------------|----------------|---------------|-----------------|---------------|----------------|---------------|-----------------|----------------|----------------|----------------|
|                 | Sample                                          | Sample      | Sample        | Sample        | Sample         | Sample        | Sample         | Sample         | Sample         | Sample        | Sample          | Sample        | Sample         | Sample        | Sample          | Sample         | Sample         | Sample         |
|                 | 1                                               | 2           | 3             | 4             | 5              | 6             | 7              | 8              | 9              | 10            | 11              | 12            | 13             | 14            | 15              | 16             | 17             | 18             |
| DMA             | ND                                              | ND          | ND            | ND            | ND             | ND            | ND             | ND             | ND             | ND            | 0.324±0.024     | ND            | ND             | ND            | ND              | ND             | 1.34±0.031     | 0.158±0.0096   |
| DEA             | ND                                              | ND          | ND            | ND            | ND             | ND            | ND             | ND             | ND             | ND            | ND              | ND            | ND             | ND            | ND              | ND             | ND             | ND             |
| DMP             | 3.06±0.062                                      | 2.62±0.22   | 0.546±0.035   | 0.491±0.034   | 0.900±0.014    | 0.709±0.025   | 0.714±0.023    | 0.419±0.044    | 0.293±0.029    | 2.68±0.15     | 0.628±0.045     | 0.458±0.016   | 0.0940±0.0016  | 0.185±0.0055  | 0.360±0.012     | 0.201±0.0079   | 0.148±0.0068   | 1.04±0.014     |
| DEP             | 5.68±0.055                                      | 1.19±0.052  | 0.373±0.020   | 0.276±0.0014  | 0.600±0.034    | 0.527±0.016   | 0.237±0.031    | 0.351±0.028    | 0.368±0.0095   | 0.584±0.057   | 0.137±0.0069    | 0.124±0.0044  | 0.0504±0.00054 | 0.298±0.0088  | 0.419±0.017     | 0.0818±0.0046  | 0.0480±0.0039  | 0.119±0.0066   |
| TBP             | 0.0730±0.0025                                   | ND          | ND            | ND            | ND             | ND            | ND             | ND             | ND             | ND            | 0.0377±0.0025   | ND            | ND             | ND            | ND              | ND             | ND             | ND             |
| DIPrP           | ND                                              | ND          | ND            | ND            | ND             | ND            | ND             | ND             | ND             | ND            | ND              | ND            | ND             | ND            | ND              | ND             | ND             | ND             |
| DIBA            | 0.0326±0.0027                                   | ND          | 0.111±0.0071  | 0.0532±0.0022 | 0.0780±0.00054 | 0.106±0.0078  | ND             | ND             | ND             | ND            | 0.238±0.0064    | 0.159±0.011   | 0.0791±0.00031 | 0.150±0.0075  | 0.173±0.0054    | 0.117±0.0032   | 0.0644±0.00032 | 0.0567±0.00025 |
| DALP            | ND                                              | ND          | D             | ND            | ND             | ND            | ND             | ND             | ND             | ND            | ND              | ND            | ND             | ND            | ND              | ND             | ND             | ND             |
| DBA             | 0.237±0.0045                                    | ND          | 0.0936±0.0054 | 0.183±0.0031  | 0.179±0.0053   | ND            | 0.0655±0.0027  | 0.0417±0.0010  | ND             | ND            | 0.495±0.024     | 0.249±0.017   | 0.130±0.013    | 0.597±0.032   | 0.746±0.031     | 0.0883±0.0087  | 0.0549±0.0051  | 0.0361±0.0030  |
| DPrP            | ND                                              | ND          | ND            | ND            | ND             | ND            | ND             | ND             | ND             | ND            | ND              | ND            | ND             | ND            | ND              | ND             | ND             | ND             |
| DIBP            | 5.02±0.21                                       | 0.456±0.015 | 0.0531±0.0025 | 0.230±0.0093  | 0.0904±0.0030  | 0.0645±0.0039 | 0.0326±0.00028 | 0.0863±0.00074 | 0.0566±0.00020 | 0.0845±0.0021 | 0.00933±0.00033 | 0.0340±0.0029 | 0.0803±0.0056  | 0.0523±0.0042 | 0.00683±0.00025 | 0.0152±0.00085 | 0.0171±0.00013 | 0.0222±0.00083 |
| DBP             | 4.48±0.16                                       | 6.36±0.40   | ND            | 2.38±0.019    | 2.03±0.023     | ND            | 1.36±0.099     | ND             | 2.43±0.11      | ND            | 2.16±0.049      | 0.566±0.050   | ND             | 1.74±0.16     | 3.17±0.12       | 0.345±0.012    | ND             | 0.0882±0.0052  |
| DIPP            | ND                                              | ND          | ND            | ND            | ND             | ND            | ND             | ND             | ND             | ND            | ND              | ND            | ND             | ND            | ND              | ND             | ND             | ND             |
| DMPP            | ND                                              | ND          | ND            | ND            | ND             | ND            | ND             | ND             | ND             | ND            | 0.0279±0.0017   | D             | ND             | ND            | D               | ND             | ND             | ND             |

|       |              |             |           |              |             |             |            |           |            |            |                |               |                |               |                |               |                |               |
|-------|--------------|-------------|-----------|--------------|-------------|-------------|------------|-----------|------------|------------|----------------|---------------|----------------|---------------|----------------|---------------|----------------|---------------|
| DAP   | ND           | ND          | ND        | ND           | ND          | ND          | ND         | ND        | ND         | ND         | ND             | ND            | ND             | ND            | ND             | ND            | ND             | ND            |
| ATBC  | ND           | ND          | ND        | 0.216±0.0068 | ND          | ND          | ND         | ND        | ND         | ND         | ND             | ND            | ND             | ND            | ND             | ND            | ND             | ND            |
| TDCPP | ND           | ND          | ND        | ND           | ND          | ND          | ND         | ND        | ND         | ND         | ND             | ND            | ND             | ND            | ND             | ND            | ND             | ND            |
| DHxP  | ND           | ND          | ND        | ND           | ND          | ND          | ND         | ND        | ND         | ND         | 0.116±0.0054   | 0.0497±0.0049 | 0.0240±0.00070 | ND            | 0.0330±0.00017 | ND            | ND             | ND            |
| BBP   | ND           | ND          | ND        | ND           | ND          | ND          | ND         | ND        | ND         | ND         | 0.0790±0.0029  | 0.187±0.0066  | 0.123±0.0072   | 0.0860±0.0026 | ND             | 0.0360±0.0018 | 0.0470±0.0032  | 0.193±0.018   |
| DEHA  | ND           | ND          | ND        | ND           | ND          | ND          | ND         | ND        | ND         | ND         | 0.0332±0.00090 | D             | ND             | ND            | ND             | ND            | ND             | 0.0462±0.0042 |
| TPP   | ND           | ND          | ND        | ND           | ND          | ND          | ND         | ND        | ND         | ND         | ND             | ND            | ND             | ND            | ND             | ND            | ND             | ND            |
| BBPA  | ND           | ND          | ND        | ND           | ND          | ND          | ND         | ND        | ND         | ND         | ND             | ND            | ND             | ND            | ND             | ND            | ND             | ND            |
| TEHP  | ND           | ND          | ND        | ND           | ND          | ND          | ND         | ND        | ND         | ND         | ND             | ND            | ND             | ND            | ND             | ND            | ND             | ND            |
| DCHP  | ND           | ND          | ND        | ND           | ND          | ND          | ND         | ND        | ND         | ND         | ND             | ND            | ND             | ND            | ND             | ND            | ND             | ND            |
| DHP   | ND           | 1.49±0.037  | ND        | ND           | ND          | 0.229±0.025 | ND         | D         | ND         | ND         | D              | ND            | 0.0205±0.00015 | ND            | ND             | D             | 0.0216±0.00016 | ND            |
| DEHP  | 0.807±0.059  | 0.663±0.064 | 2.26±0.13 | 3.60±0.15    | 3.25±0.099  | 1.23±0.027  | 2.15±0.041 | 2.30±0.21 | 2.09±0.016 | 1.83±0.040 | 2.12±0.047     | 1.29±0.085    | 0.728±0.054    | 2.29±0.20     | 3.33±0.11      | 1.13±0.056    | 0.959±0.085    | 2.57±0.14     |
| DPhP  | 0.125±0.0045 | ND          | ND        | ND           | 0.128±0.011 | ND          | ND         | ND        | ND         | ND         | ND             | ND            | ND             | ND            | ND             | ND            | ND             | ND            |
| TOCP  | ND           | ND          | ND        | ND           | ND          | ND          | ND         | ND        | ND         | ND         | ND             | ND            | ND             | ND            | ND             | ND            | ND             | ND            |
| DNOP  | ND           | ND          | ND        | ND           | ND          | ND          | ND         | ND        | ND         | ND         | ND             | ND            | ND             | ND            | ND             | ND            | ND             | ND            |
| TOTAL | 19.5±0.30    | 12.8±0.70   | 3.44±0.12 | 7.43±0.15    | 7.25±0.12   | 2.87±0.031  | 4.56±0.18  | 3.21±0.28 | 5.23±0.13  | 5.18±0.24  | 6.42±0.011     | 3.15±0.087    | 1.33±0.055     | 5.40±0.17     | 8.25±0.080     | 2.03±0.084    | 2.70±0.080     | 4.34±0.14     |

ND: not detected (concentration < LOD); D: detected (LOD < concentration < LOQ), values are included in total concentration calculations.

**Table S9 Concentrations of plasticizer residues in bottled water samples after microextraction by DI-SPME and determination by GC-MS/MS**

| Componen<br>ts | Concentration of plasticizers in samples (µg/L) |              |               |               |              |               |             |             |               |             |               |              |
|----------------|-------------------------------------------------|--------------|---------------|---------------|--------------|---------------|-------------|-------------|---------------|-------------|---------------|--------------|
|                | Sample 19                                       | Sample 20    | Sample 21     | Sample 22     | Sample 23    | Sample 24     | Sample 25   | Sample 26   | Sample 27     | Sample 28   | Sample 29     | Sample 30    |
| DMA            | ND                                              | ND           | ND            | ND            | ND           | ND            | ND          | ND          | ND            | ND          | ND            | ND           |
| DEA            | ND                                              | ND           | ND            | ND            | ND           | ND            | ND          | ND          | ND            | ND          | ND            | ND           |
| DMP            | 0.107±0.0089                                    | 0.194±0.0044 | 0.509±0.025   | 0.0609±0.0028 | 0.246±0.0064 | 0.145±0.0093  | ND          | 0.255±0.016 | 0.0896±0.0051 | ND          | 0.219±0.015   | 0.117±0.0038 |
| DEP            | ND                                              | ND           | ND            | ND            | 0.105±0.0048 | 0.272±0.014   | 0.434±0.022 | 0.125±0.012 | 0.268±0.011   | ND          | 0.329±0.013   | 0.170±0.0031 |
| TBP            | ND                                              | ND           | ND            | ND            | ND           | ND            | ND          | ND          | ND            | ND          | ND            | ND           |
| DIPrP          | ND                                              | ND           | ND            | ND            | ND           | ND            | ND          | ND          | ND            | ND          | ND            | ND           |
| DIBA           | ND                                              | ND           | 0.0211±0.0012 | ND            | ND           | ND            | ND          | ND          | ND            | ND          | ND            | ND           |
| DALP           | ND                                              | ND           | ND            | ND            | ND           | ND            | ND          | ND          | ND            | ND          | ND            | ND           |
| DBA            | ND                                              | ND           | ND            | ND            | ND           | ND            | ND          | ND          | ND            | ND          | ND            | ND           |
| DPrP           | ND                                              | ND           | ND            | ND            | ND           | ND            | ND          | ND          | ND            | ND          | 0.0547±0.0057 | ND           |
| DIBP           | 2.56±0.22                                       | 3.43±0.16    | 0.636±0.015   | 3.78±0.37     | 0.269±0.019  | 0.0768±0.0012 | 0.848±0.017 | 0.217±0.020 | 1.51±0.052    | 0.447±0.028 | 0.103±0.0098  | 1.12±0.093   |
| DBP            | 3.31±0.13                                       | 3.78±0.37    | 1.47±0.10     | 4.85±0.14     | 0.876±0.0065 | 0.633±0.014   | 1.32±0.024  | 1.64±0.024  | 2.03±0.014    | 3.54±0.15   | 1.82±0.11     | 2.24±0.011   |
| DIPP           | ND                                              | ND           | ND            | ND            | ND           | ND            | ND          | ND          | ND            | ND          | ND            | ND           |
| DMPP           | ND                                              | ND           | ND            | ND            | ND           | ND            | ND          | ND          | ND            | ND          | ND            | ND           |
| DAP            | ND                                              | ND           | ND            | ND            | ND           | ND            | ND          | ND          | ND            | ND          | ND            | ND           |
| ATBC           | ND                                              | ND           | ND            | ND            | ND           | ND            | ND          | ND          | ND            | ND          | ND            | ND           |
| TDCPP          | ND                                              | ND           | ND            | ND            | ND           | ND            | ND          | ND          | ND            | ND          | ND            | ND           |
| DHxP           | ND                                              | ND           | ND            | ND            | ND           | ND            | ND          | ND          | ND            | ND          | ND            | ND           |
| BBP            | ND                                              | ND           | ND            | ND            | ND           | ND            | ND          | ND          | ND            | ND          | ND            | ND           |
| DEHA           | ND                                              | D            | ND            | ND            | ND           | ND            | ND          | ND          | ND            | ND          | ND            | ND           |
| TPP            | ND                                              | ND           | ND            | ND            | ND           | ND            | ND          | ND          | ND            | ND          | ND            | ND           |
| BBPA           | ND                                              | ND           | ND            | ND            | ND           | ND            | ND          | ND          | ND            | ND          | ND            | ND           |
| TEHP           | ND                                              | ND           | ND            | ND            | ND           | ND            | ND          | ND          | ND            | ND          | ND            | ND           |
| DCHP           | ND                                              | ND           | ND            | ND            | ND           | ND            | ND          | ND          | ND            | ND          | ND            | ND           |
| DHP            | ND                                              | ND           | ND            | ND            | ND           | ND            | ND          | ND          | ND            | ND          | ND            | ND           |
| DEHP           | 2.42±0.11                                       | 1.31±0.27    | 2.78±0.15     | 2.51±0.25     | 2.99±0.10    | 0.334±0.023   | 1.76±0.067  | 3.27±0.058  | 0.745±0.0085  | 4.15±0.062  | 3.39±0.26     | 1.51±0.14    |

|       |           |           |           |           |           |            |            |            |            |           |           |               |
|-------|-----------|-----------|-----------|-----------|-----------|------------|------------|------------|------------|-----------|-----------|---------------|
| DPhP  | ND        | ND        | ND        | ND        | ND        | ND         | ND         | ND         | ND         | ND        | ND        | 0.0225±0.0022 |
| TOCP  | ND        | ND        | ND        | ND        | ND        | ND         | ND         | ND         | ND         | ND        | ND        | ND            |
| DNOP  | ND        | ND        | ND        | ND        | ND        | ND         | ND         | ND         | ND         | ND        | ND        | ND            |
| TOTAL | 8.39±0.32 | 8.73±0.48 | 5.42±0.21 | 11.2±0.66 | 4.49±0.10 | 1.46±0.046 | 4.36±0.064 | 5.51±0.094 | 4.65±0.050 | 8.14±0.21 | 5.92±0.31 | 5.18±0.034    |

ND: not detected (concentration < LOD); D: detected (LOD < concentration < LOQ), values are included in total concentration calculations.

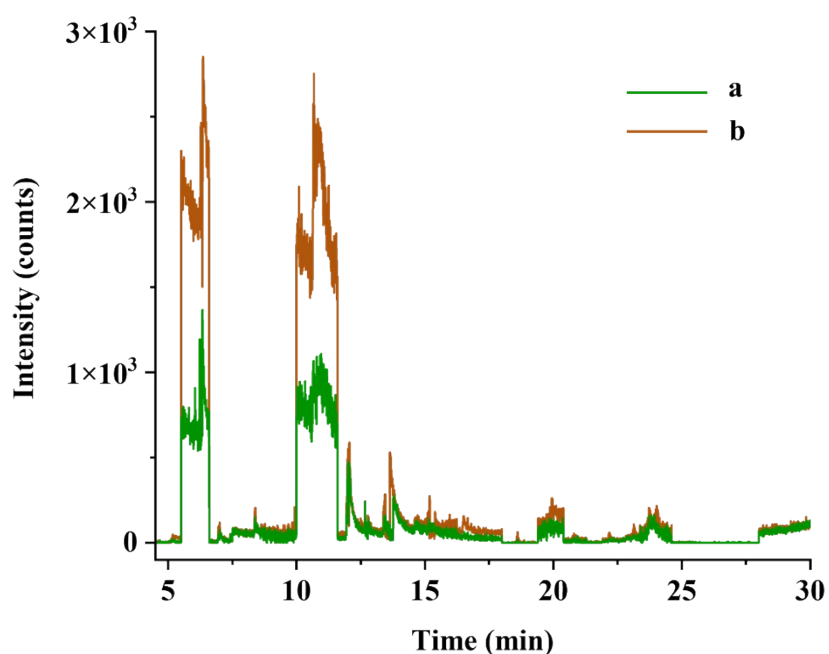

Fig. S1. Comparison of procedural blank chromatograms obtained (a) under routine conditions before the sample sequence and (b) after analysis of a 5  $\mu\text{g/L}$  spiked sample. No internal standards were added to the procedural blanks.

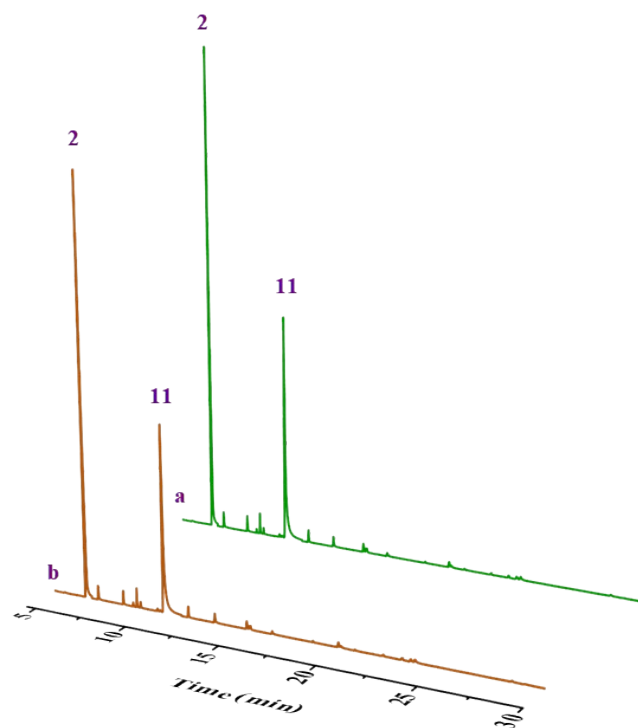

Fig. S2. Comparison of TICs obtained using the same SPME Arrow for a spiked water sample (a) before and (b) after 100 extraction cycles. The 29 analytes were spiked at 0.5  $\mu\text{g/L}$ , and the two internal standards were added at 2  $\mu\text{g/L}$ .

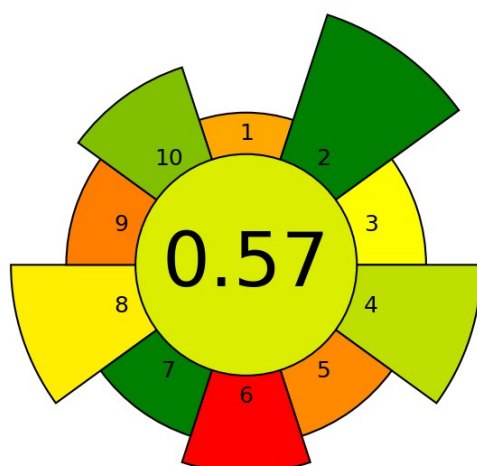

**Fig. S3. AGREEprep assessment of the developed DI-SPME-GC-MS/MS method.**

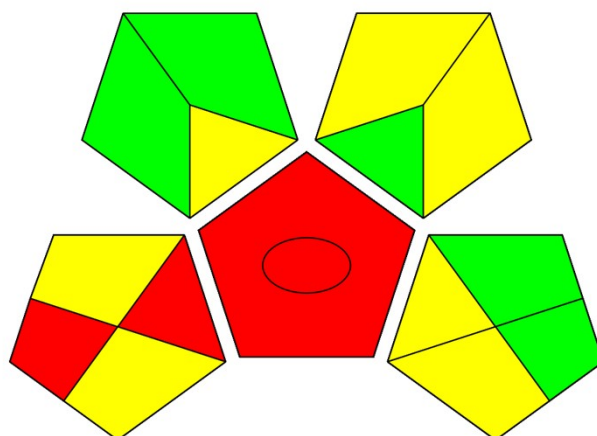

**Fig. S4. GAPI assessment of the developed DI-SPME-GC-MS/MS method.**

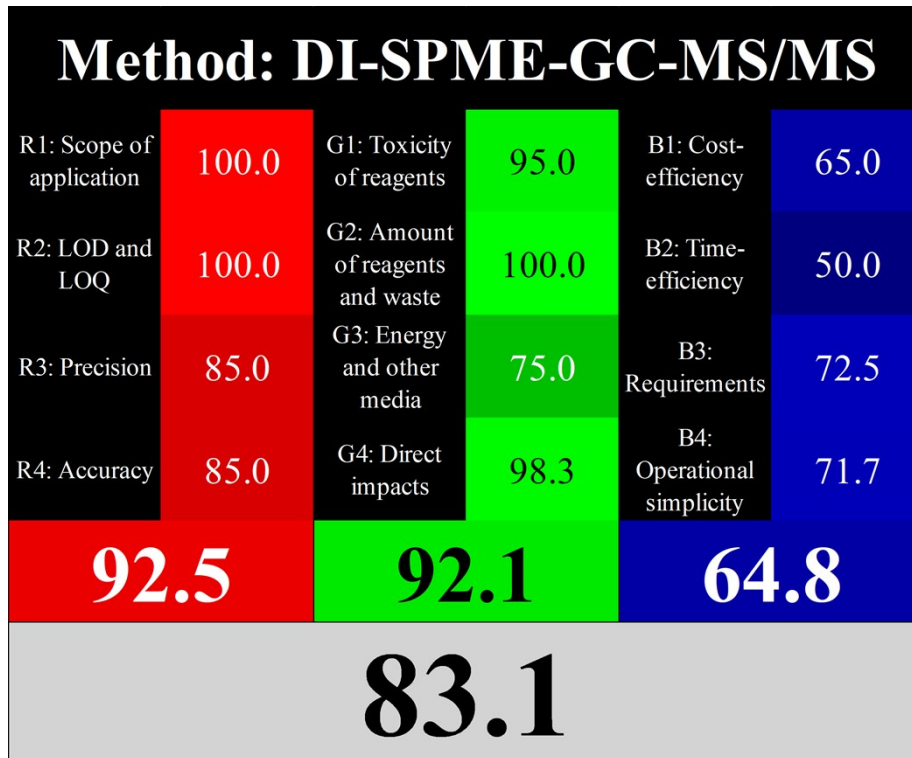

Fig. S5. RGB12 Whiteness assessment of the developed DI-SPME-GC-MS/MS method.

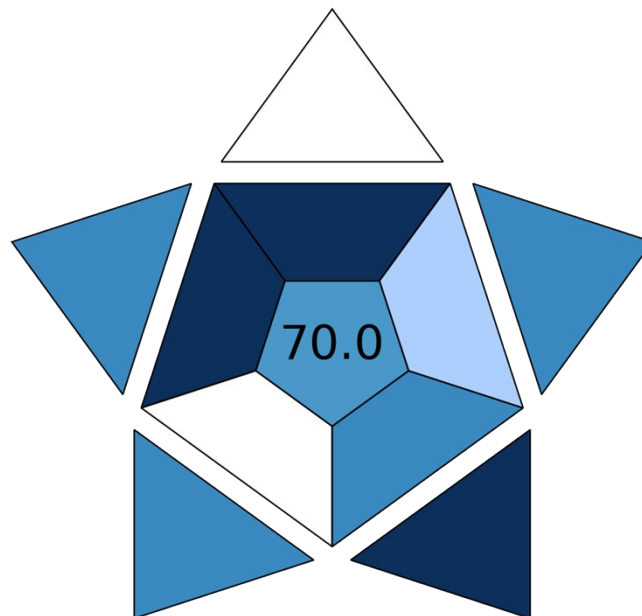

Fig. S6. BAGI assessment of the developed DI-SPME-GC-MS/MS method.
